# Supplementary material for: Comparison of RNA-Seq by poly (A) capture, ribosomal RNA depletion, and DNA microarray for expression profiling
Source: PubMed Central journal article supplement (PMC4070569; doi:10.1186/1471-2164-15-419), 2014-06-02

Figure S1. Visual display of reads aligning to GATA3

(A)

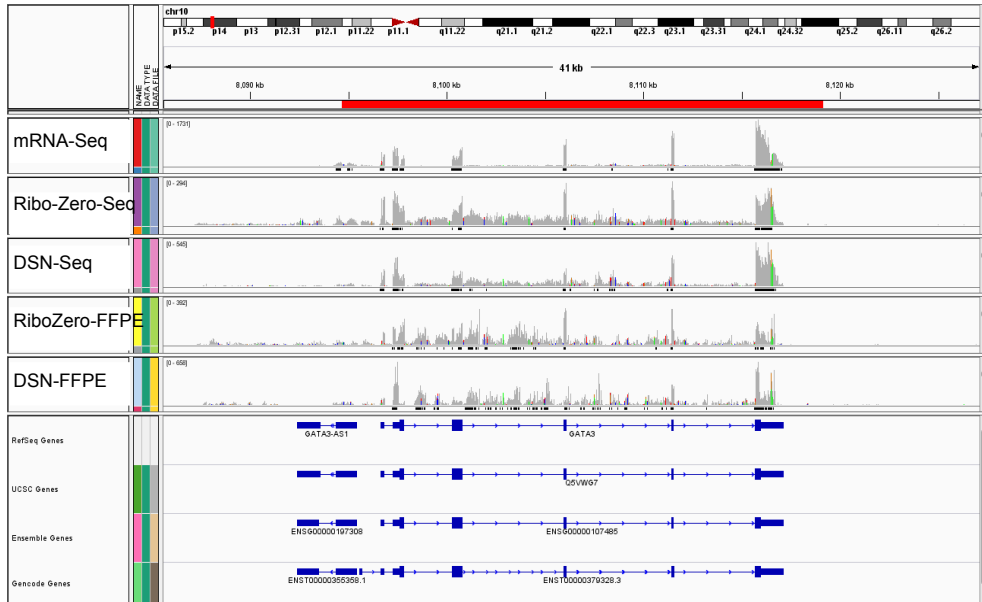

(B)

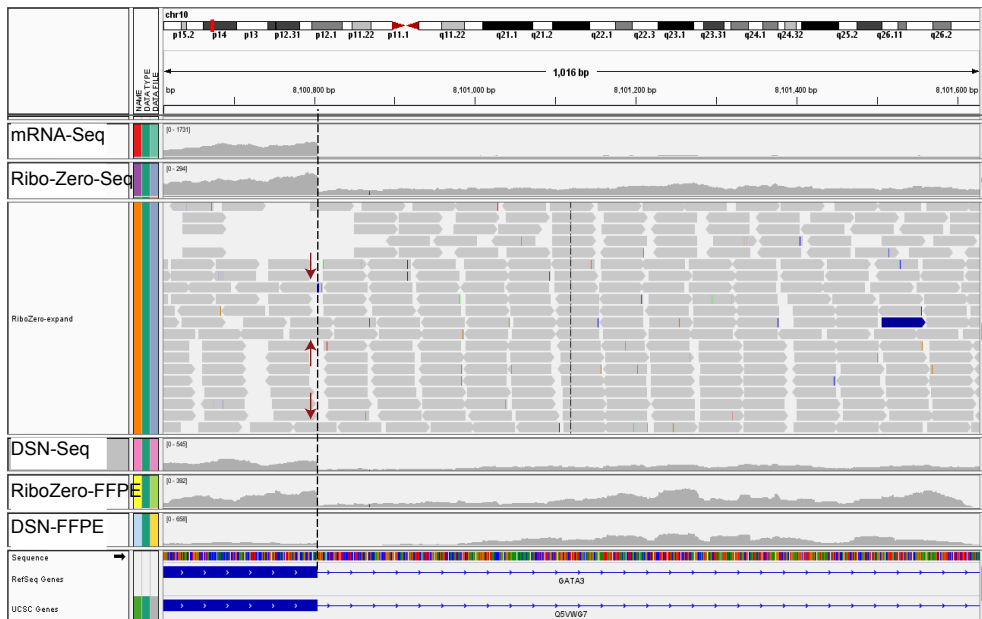

Supplement: 12864_2014_6149_MOESM1_ESM.pdf [file 12864_2014_6149_MOESM1_ESM.pdf]
