# Supplementary material for: Comparison of RNA-Seq by poly (A) capture, ribosomal RNA depletion, and DNA microarray for expression profiling
Source: PubMed Central journal article supplement (PMC4070569; doi:10.1186/1471-2164-15-419), 2014-06-02

**Figure S2. Hierarchical cluster using a breast cancer intrinsic gene set of 88 breast tumor samples prepared using the multiple protocols, and 816 samples from the TCGA Breast Cancer Project (725 tumors and 91 normal tissues)**

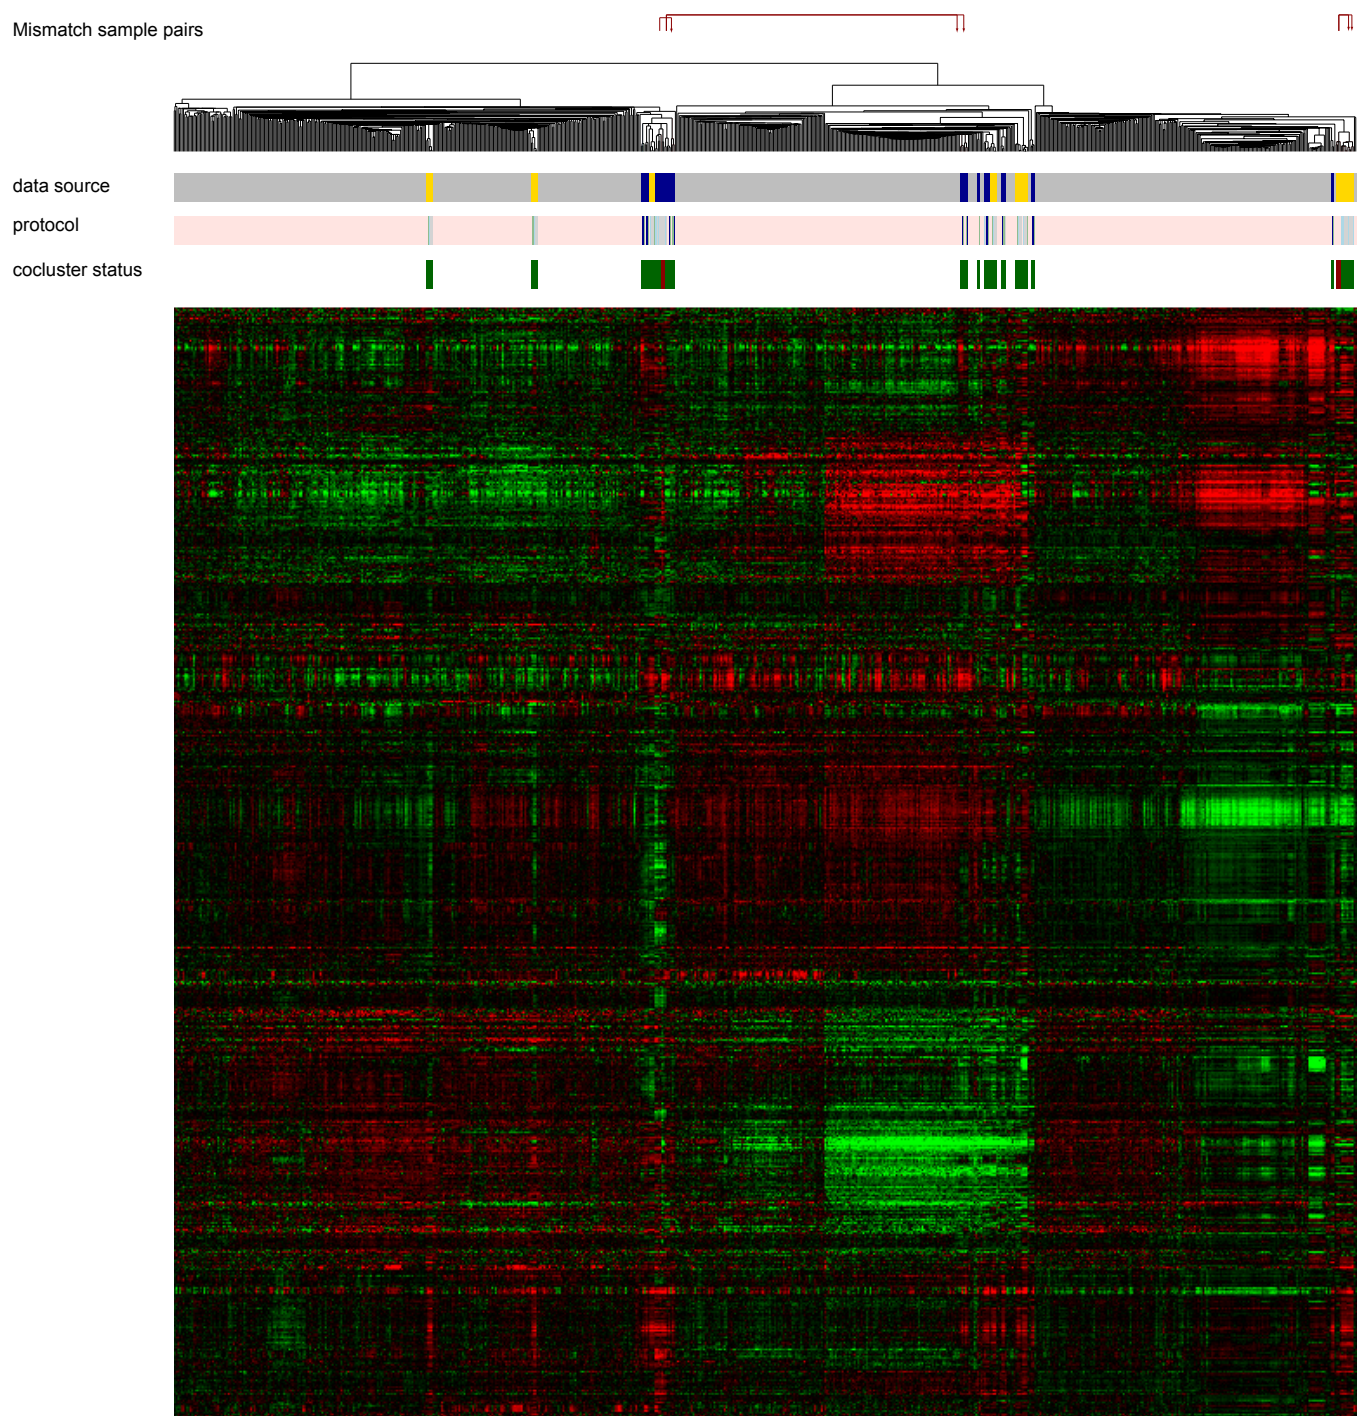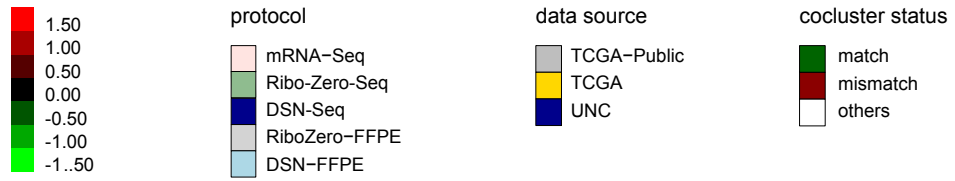

Supplement: 12864_2014_6149_MOESM2_ESM.pdf [file 12864_2014_6149_MOESM2_ESM.pdf]
