# Supplementary material for: Comparison of RNA-Seq by poly (A) capture, ribosomal RNA depletion, and DNA microarray for expression profiling
Source: PubMed Central journal article supplement (PMC4070569; doi:10.1186/1471-2164-15-419), 2014-06-02

**Figure S3. Comparison of the top 500 differentially expressed genes between Basal and Luminal tumors detected by mRNA-Seq, Ribo-Zero-Seq and DSN-Seq.**

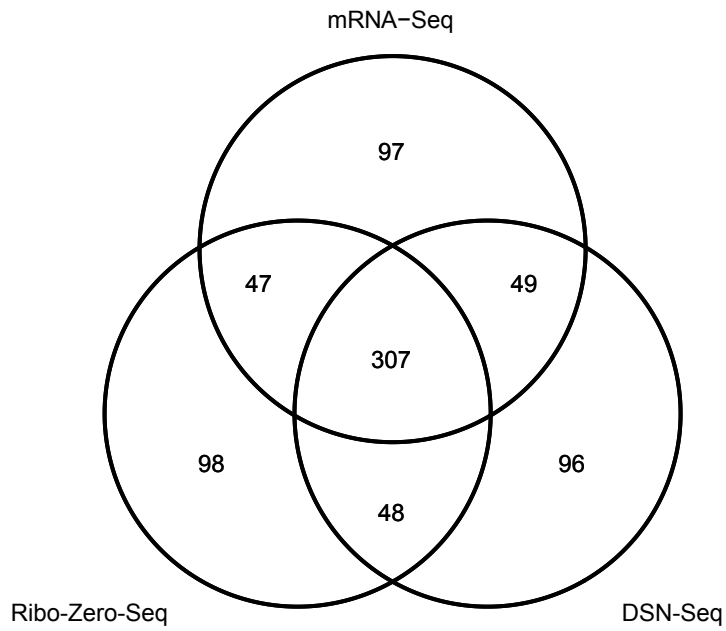

Supplement: 12864_2014_6149_MOESM3_ESM.pdf [file 12864_2014_6149_MOESM3_ESM.pdf]
